# Supplementary material for: Optical sensing system based on wireless paired emitter detector diode device and ionogels for lab-on-a-disc water quality analysis
Source: Royal Society of Chemistry journal article supplement (doi:10.1039/c2lc40781g), 2012-01-01
Supplement: c2lc40781g.pdf [file c2lc40781g.pdf]

## Novel optical sensing system based on wireless paired emitter detector diode device for Lab-on-a-Disc water quality measurements

Monika Czugała, Robert Gorkin, Thomas Phelan, Jennifer Gaughran, Vincenzo Fabio Curto, Jens **Ducrée**, Dermot Diamond and Fernando Benito-Lopez

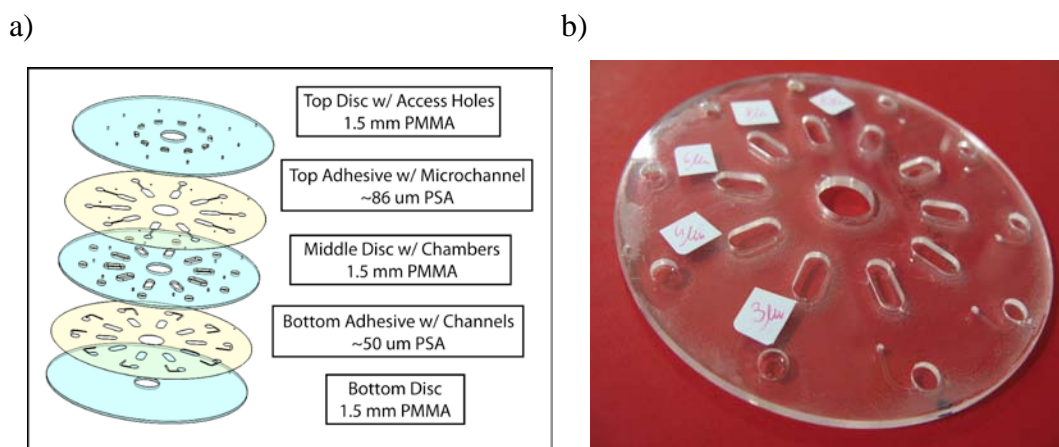

**SI-Fig. 1.** a) Scheme showing the assembly of the centrifugal disc used for the characterisation of the PEDD optical system; b) picture of the disc with milled microfluidics.

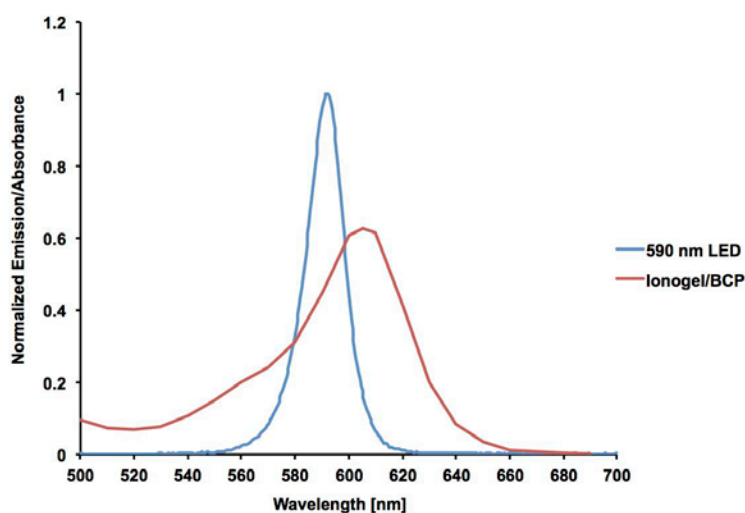

**SI-Fig. 2.** Emission spectrum (blue line) of the emitter LED ( $\lambda_{\text{max}}$  590 nm) and the absorption spectra of Bromocresol Purple (red line) in a basic environment.

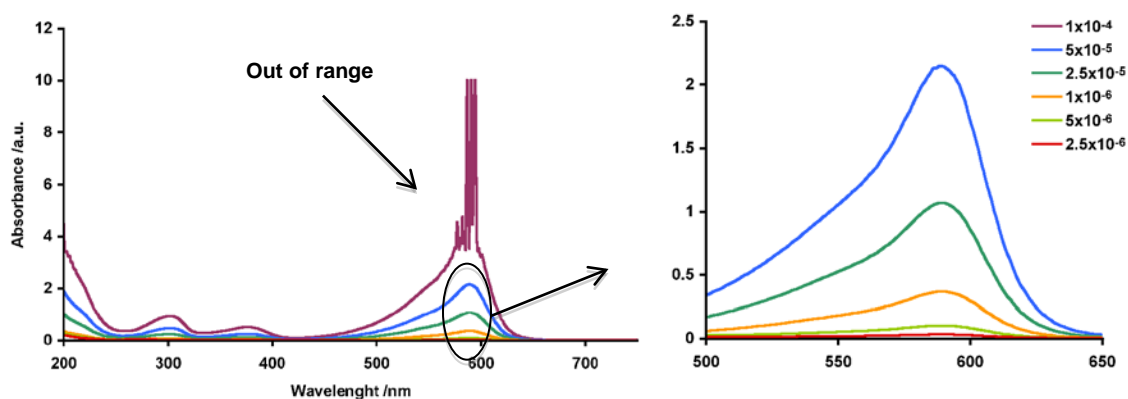

**SI-Fig. 3.** UV-Vis spectra of bromocresol purple pH dye, at different concentrations. The spectra show that bromocresol purple is quantitatively detected in the range  $2.5 \times 10^{-6}$  -  $5 \times 10^{-5}$  M using a UV-Vis spectrometer,  $L = 1$  cm.

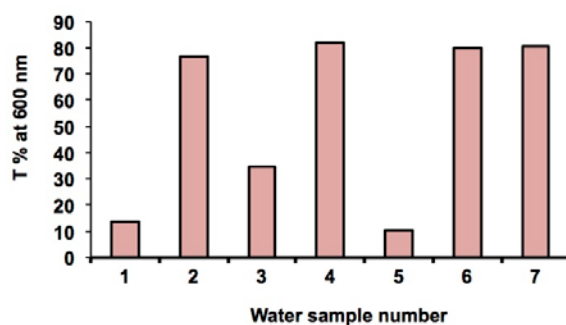

**SI-Fig. 4.** Quantitative turbidity measurements using a UV-Vis spectrometer (transmittance).
